# Supplementary material
Source: PubMed Central journal article supplement (PMC4861310)

**A**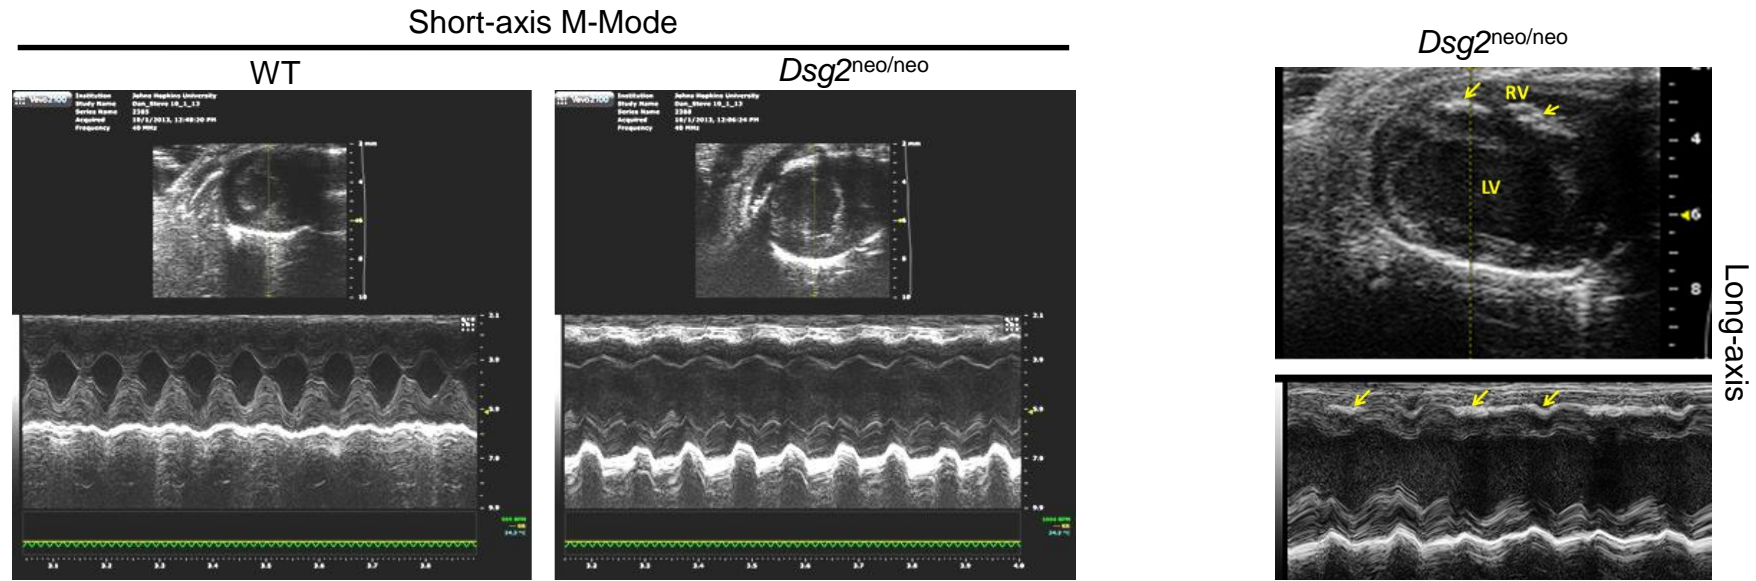**B**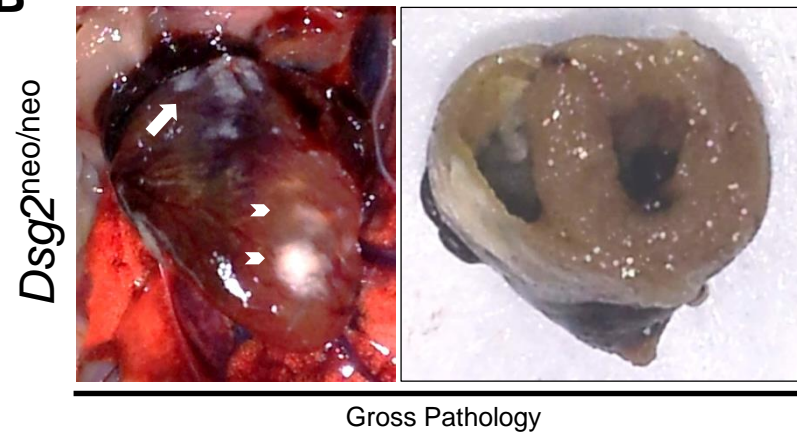**C**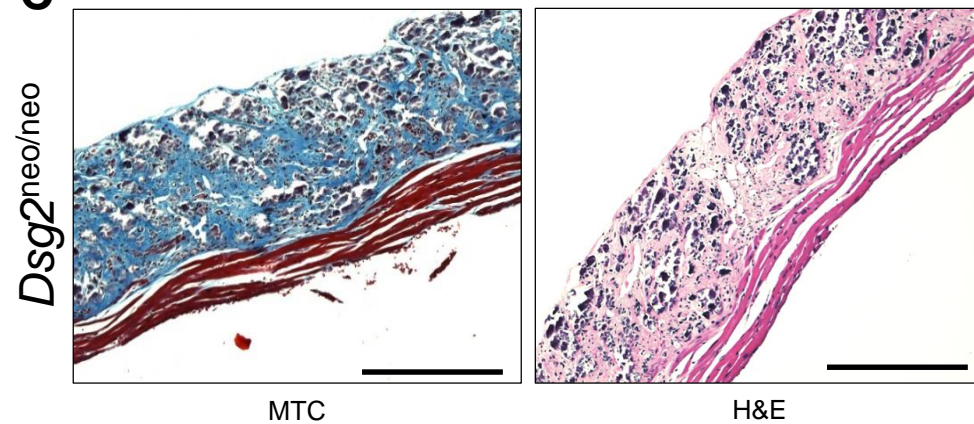

**Supplementary Figure 1. ACM disease phenotypes from *Dsg2<sup>neo/neo</sup>* mice at 16 weeks of age. (A)** Representative short-axis, m-mode and long-axis echocardiography from *Dsg2<sup>neo/neo</sup>* and WT mice. Yellow arrows; paradoxical septal wall motion with hypokinesia and fibrofatty deposits at antero-apical level; RV, right ventricle; LV, left ventricle;. **(B)** Gross pathology from *Dsg2<sup>neo/neo</sup>* mice. White arrow, RV outflow tract epicardial fibrosis; white arrowhead, LV epicardial and endocardial fibrosis. **(C)** RV myocardium stained for Masson's Trichrome (MTC) and H&E in *Dsg2<sup>neo/neo</sup>* mice. Scale bar: 100 $\mu$ m. Images are representative of n=4/genotype/parameter.

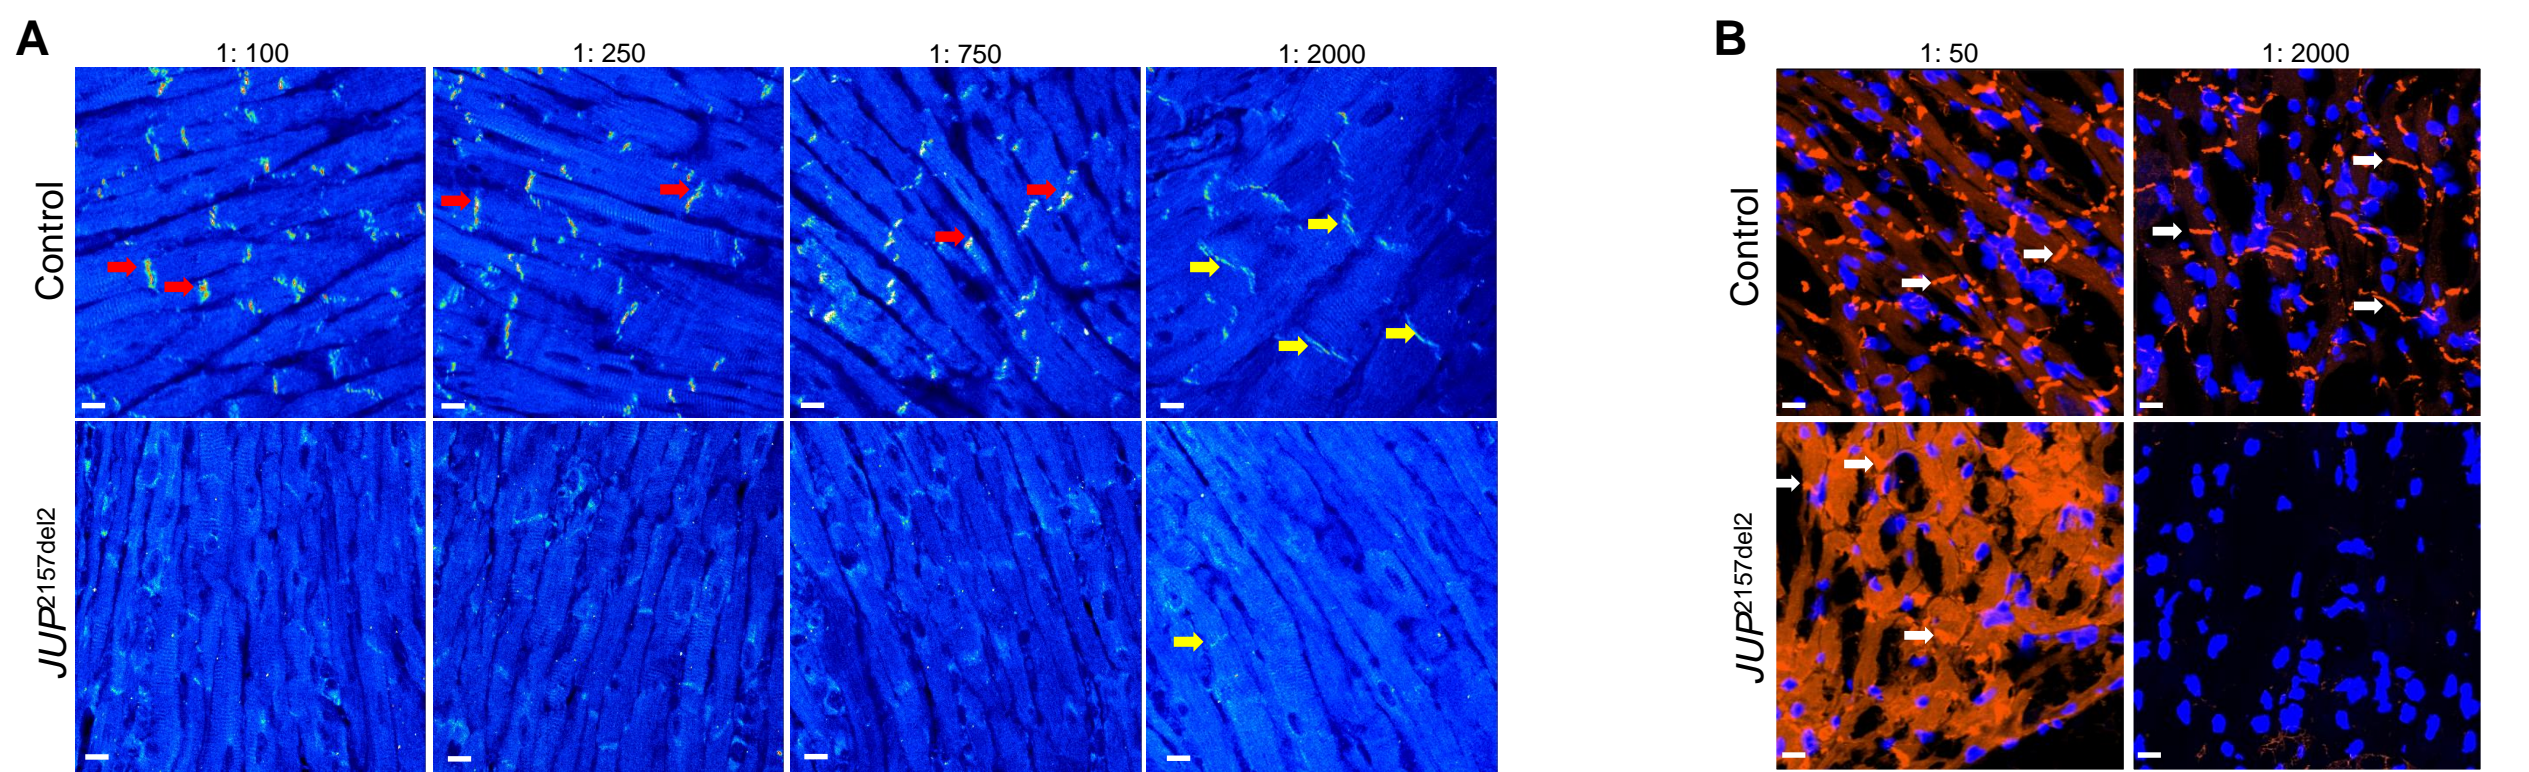

**Supplementary Figure 2. Plakoglobin immunostaining optimization.** (A) Formalin-fixed paraffin-embedded control and *JUP*<sup>2157del2</sup> mouse myocardium was immunolabeled for N-terminal directed anti-plakoglobin antibody (PLK-Nt) via serial dilution to obtain the optimal antibody concentration which demonstrated intercalated disc (ID) localization of PLK without hyper-saturation (red arrows). Serial dilution of PLK-Nt from control and *JUP*<sup>2157del2</sup> mouse myocardium reveals optimal concentration of antibody for ID signal (yellow arrows). Note, presence of PLK-Nt at IDs in *JUP*<sup>2157del2</sup> mice at a concentration of 1:2000, yet signal is considerably reduced compared to controls. Scale Bar: 10 $\mu$ m; anti-PLK-Nt from SIGMA. n=5 images/field from n=3 mice/genotype were utilized. (B) Snap-frozen myocardium from control and *JUP*<sup>2157del2</sup> mice shows ID signal for PLK-Nt (white arrows) from both genotypes at an antibody concentration of 1:50, however *JUP*<sup>2157del2</sup> mice displayed robust cytoplasmic localization. Optimal concentration of PLK-Nt was obtained at 1:2000 and showed complete absence of PLK-Nt signal in *JUP*<sup>2157del2</sup> mice myocardium. Scale Bar: 10 $\mu$ m; anti-PLK-Nt from Santa Cruz Biotechnology. n=5 images/field from n=3 mice/genotype were utilized.

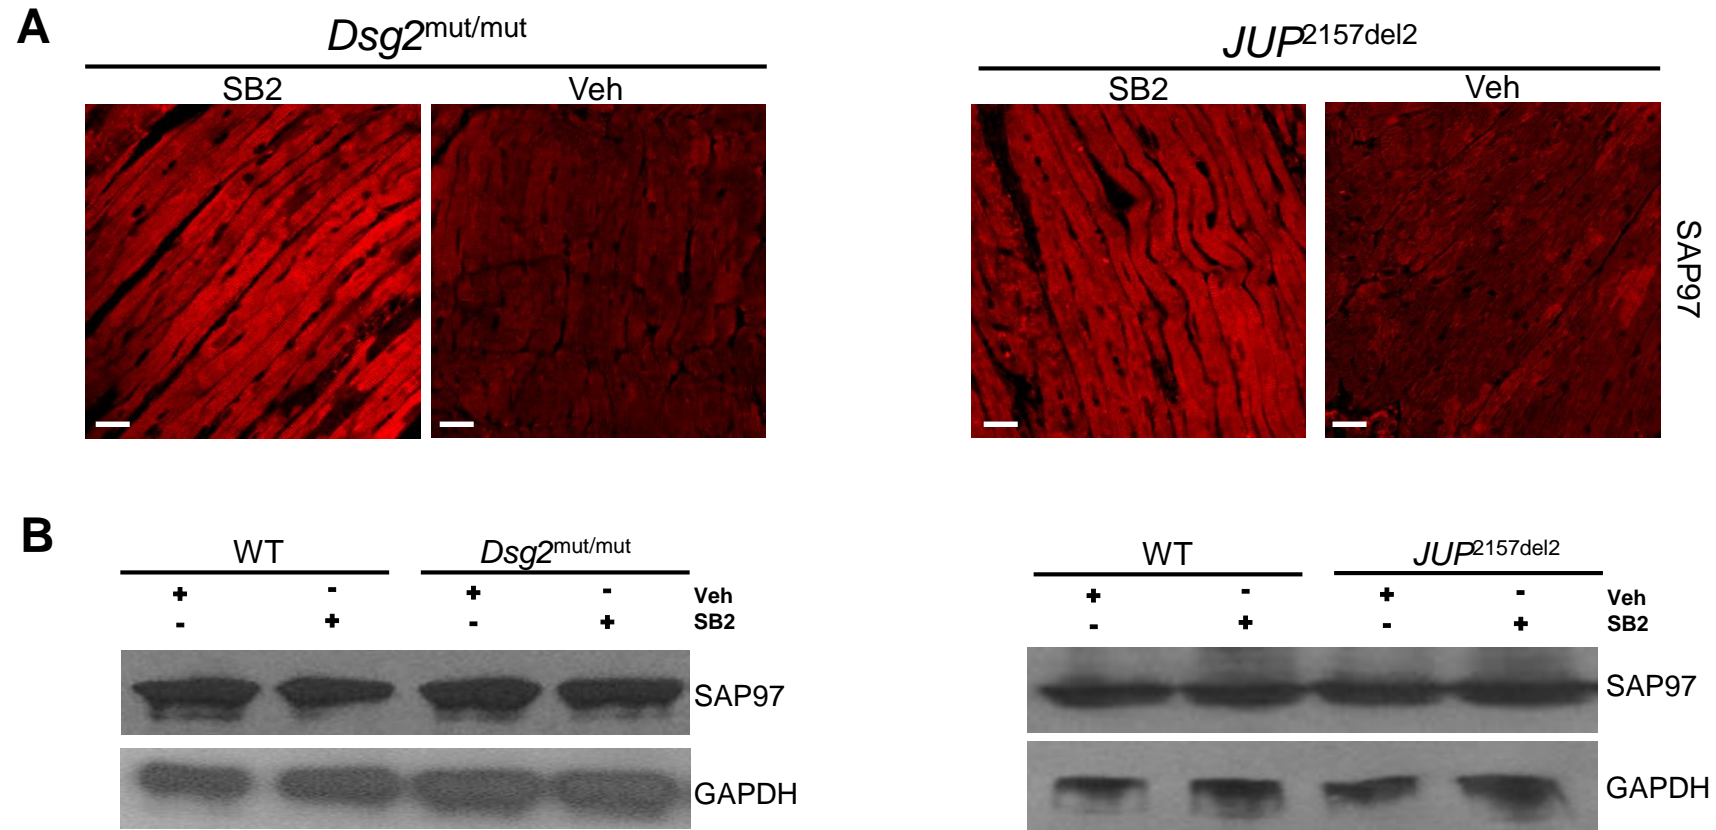

**Supplementary Figure 3. SB216763-treatment normalizes synapse associated protein 97 (SAP97) without apparent change in protein levels. (A)** Formalin-fixed, paraffin-embedded ventricular myocardium immunostained for SAP97 from WT and ACM mutant mice. Scale bar: 20 $\mu$ m. **(B)** Total cellular protein levels were probed for SAP97, normalized to GAPDH. Images are representative of n=4/genotype/treatment.

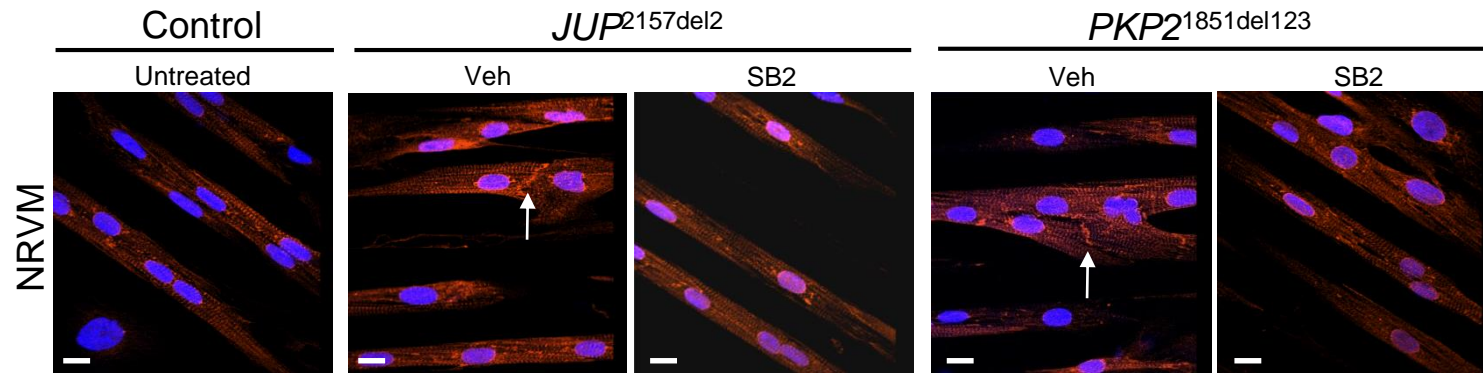

**Supplementary Figure 4. Accumulation of GSK3 $\beta$  immunosignal at the intercalated disc (ID) and reversal by SB216763 in engineered paired-myocytes.** Representative images of neonatal rat ventricular myocytes (NRVM) expressing *JUP*<sup>2157del2</sup> or *PKP2*<sup>1851del123</sup> transgenes grown on lines of fibronectin (width ~15 $\mu$ m), immunolabeled for GSK3 $\beta$  (red) and Dapi (blue). Scale bar: 10 $\mu$ m. White arrows, ID localization of GSK3 $\beta$ . Images are representative of n=3/genotype/treatment.

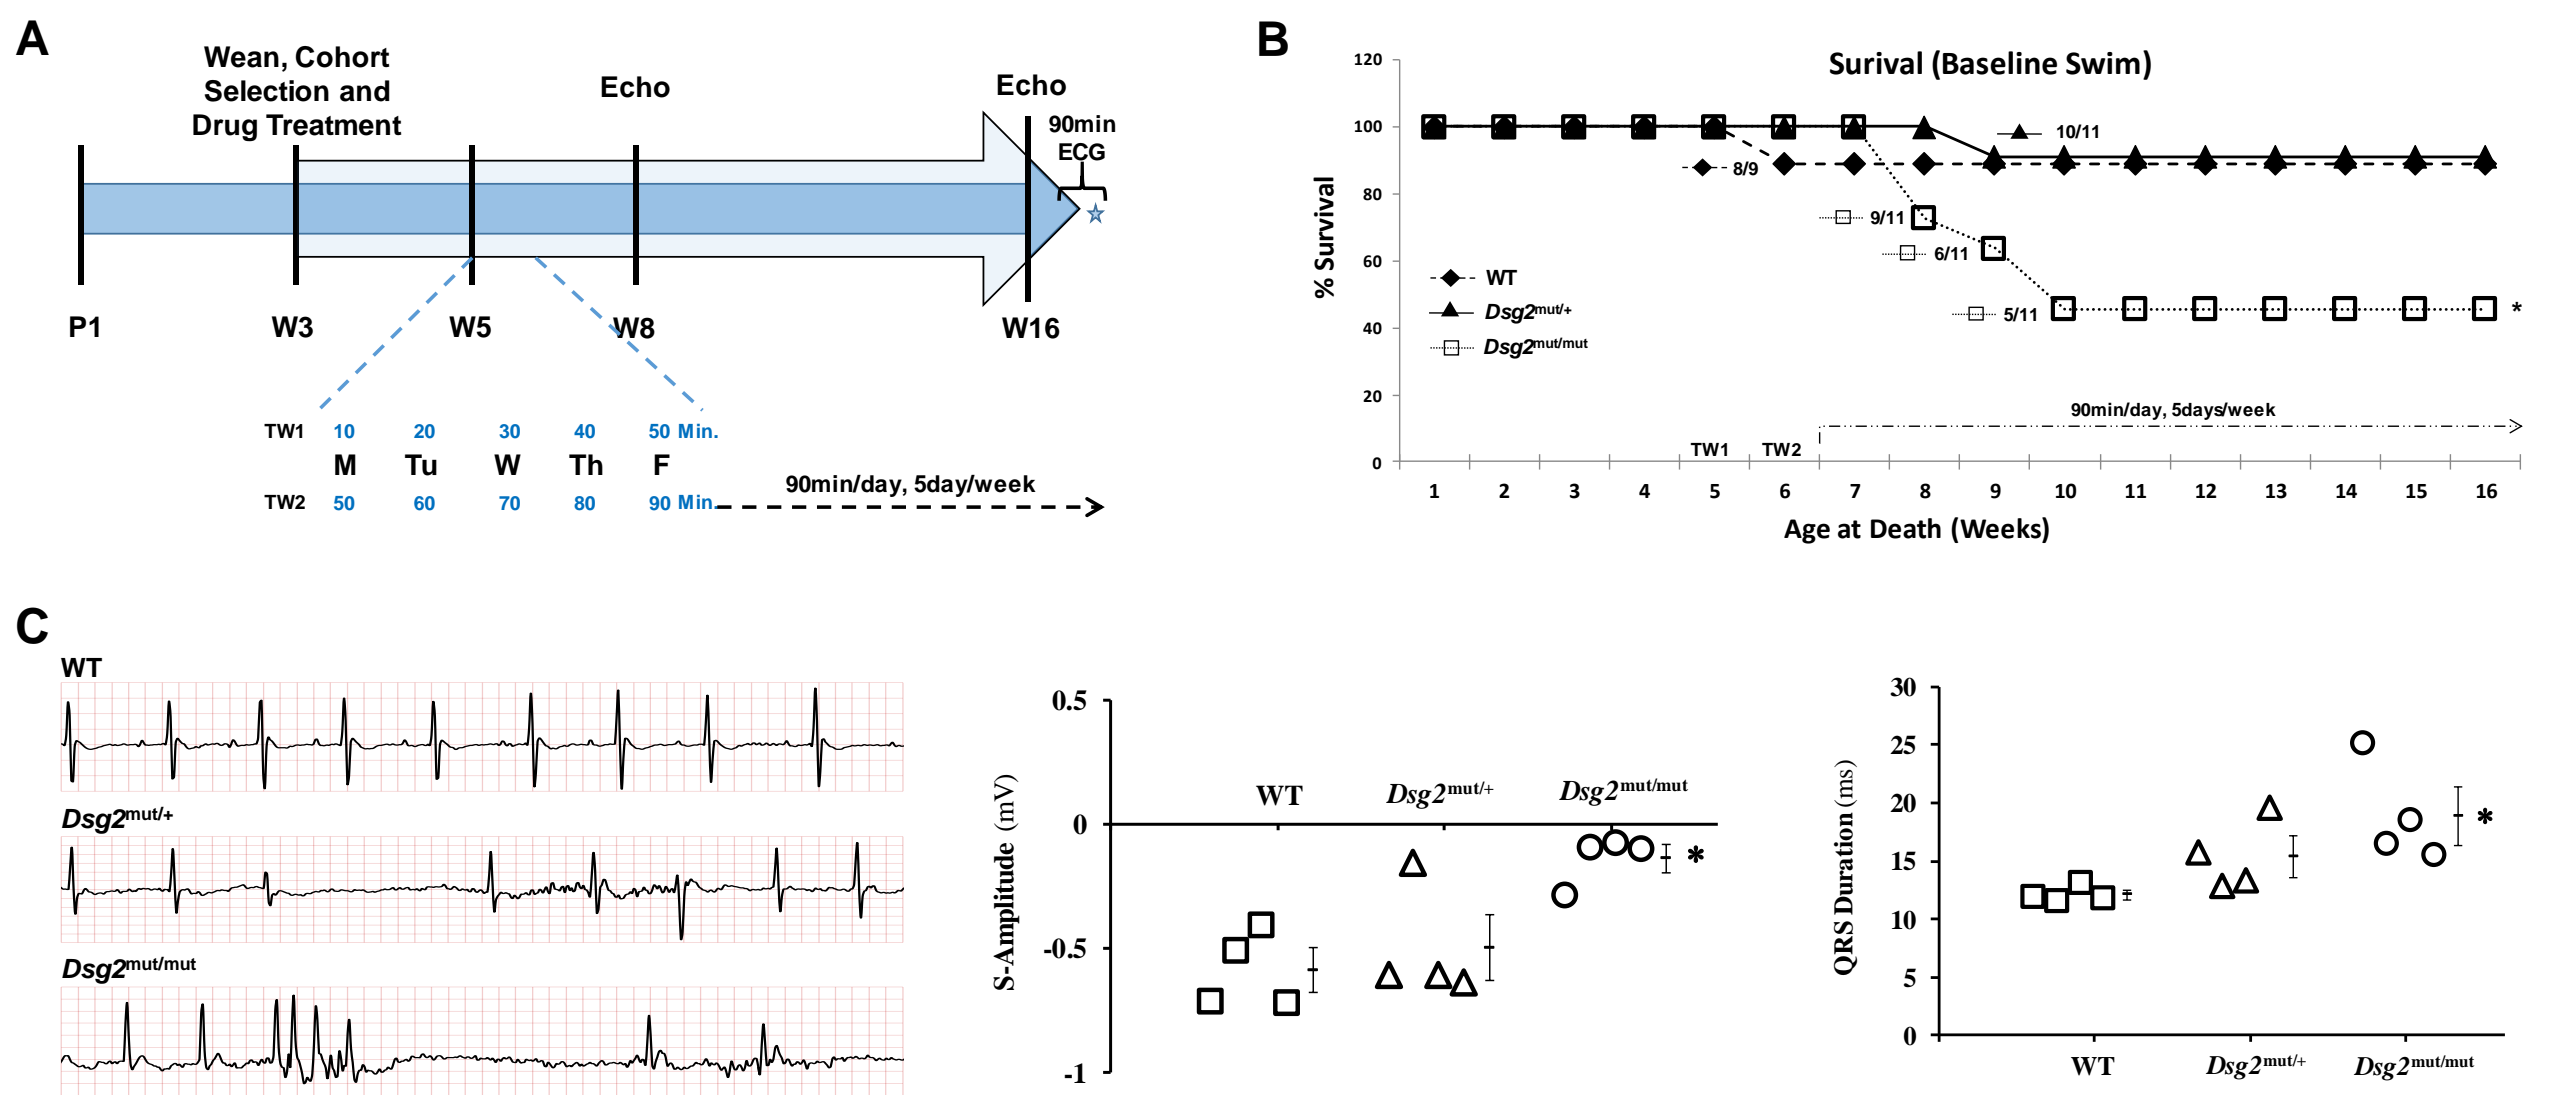

**Supplementary Figure 5. Percent survival and electrical abnormalities in baseline exercise studies.** (A) Schematic of exercise timeline. P1, postnatal day 1; TW1/TW2, training week 1/2; W3-W16, 3-16 weeks of age; M/Tu/W/Th/F, Monday-Friday; Blue star, timeline endpoint and tissue harvest following 16 week echocardiography (Echo) and 90min ECG recording. (B) Percent survival. mean±SEM, \*P<0.05 for *Dsg2<sup>mut/mut</sup>* vs WT using log-rank survival test. *n*-values inset, denominator is the total *n*-value for each genotype and the nominator is the *n*-value of survivors left during the course of the exercise study. (C) ECG telemetry tracings and parameters from exercised *Dsg2*-mutant and WT mice. mean±SEM, n=4/genotype, \*P<0.05 for *Dsg2<sup>mut/mut</sup>* vs WT using 2-tailed paired t-test.

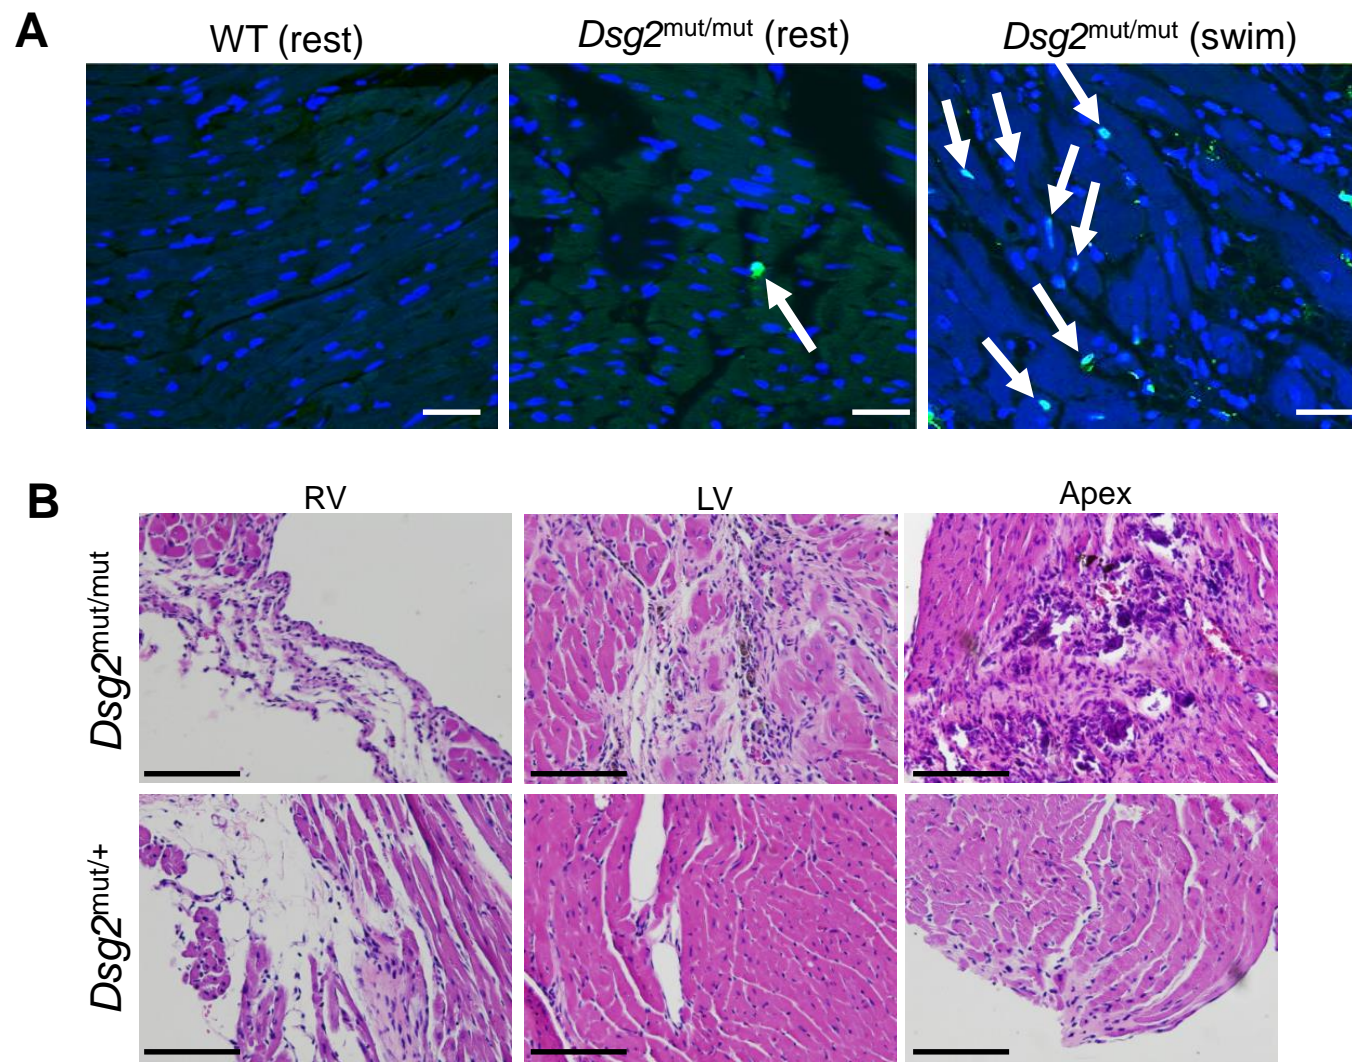

**Supplementary Figure 6. Structural abnormalities in *Dsg2*-mutant mice from baseline exercise studies.** (A) TUNEL positive nuclei from sedentary (rest) WT and *Dsg2*<sup>mut/mut</sup> mice compared to baseline exercised (swim) *Dsg2*<sup>mut/mut</sup> mice. White arrows, TUNEL-positive nuclei. Images are representative of n=4/genotype. Scale bar: 20 $\mu$ m. (B) H&E stained myocardium from baseline exercised *Dsg2*<sup>mut/mut</sup> and *Dsg2*<sup>mut/+</sup> mice. RV, right ventricle; LV, left ventricle. Images are representative of n=4/genotype. Scale bar: 100 $\mu$ m

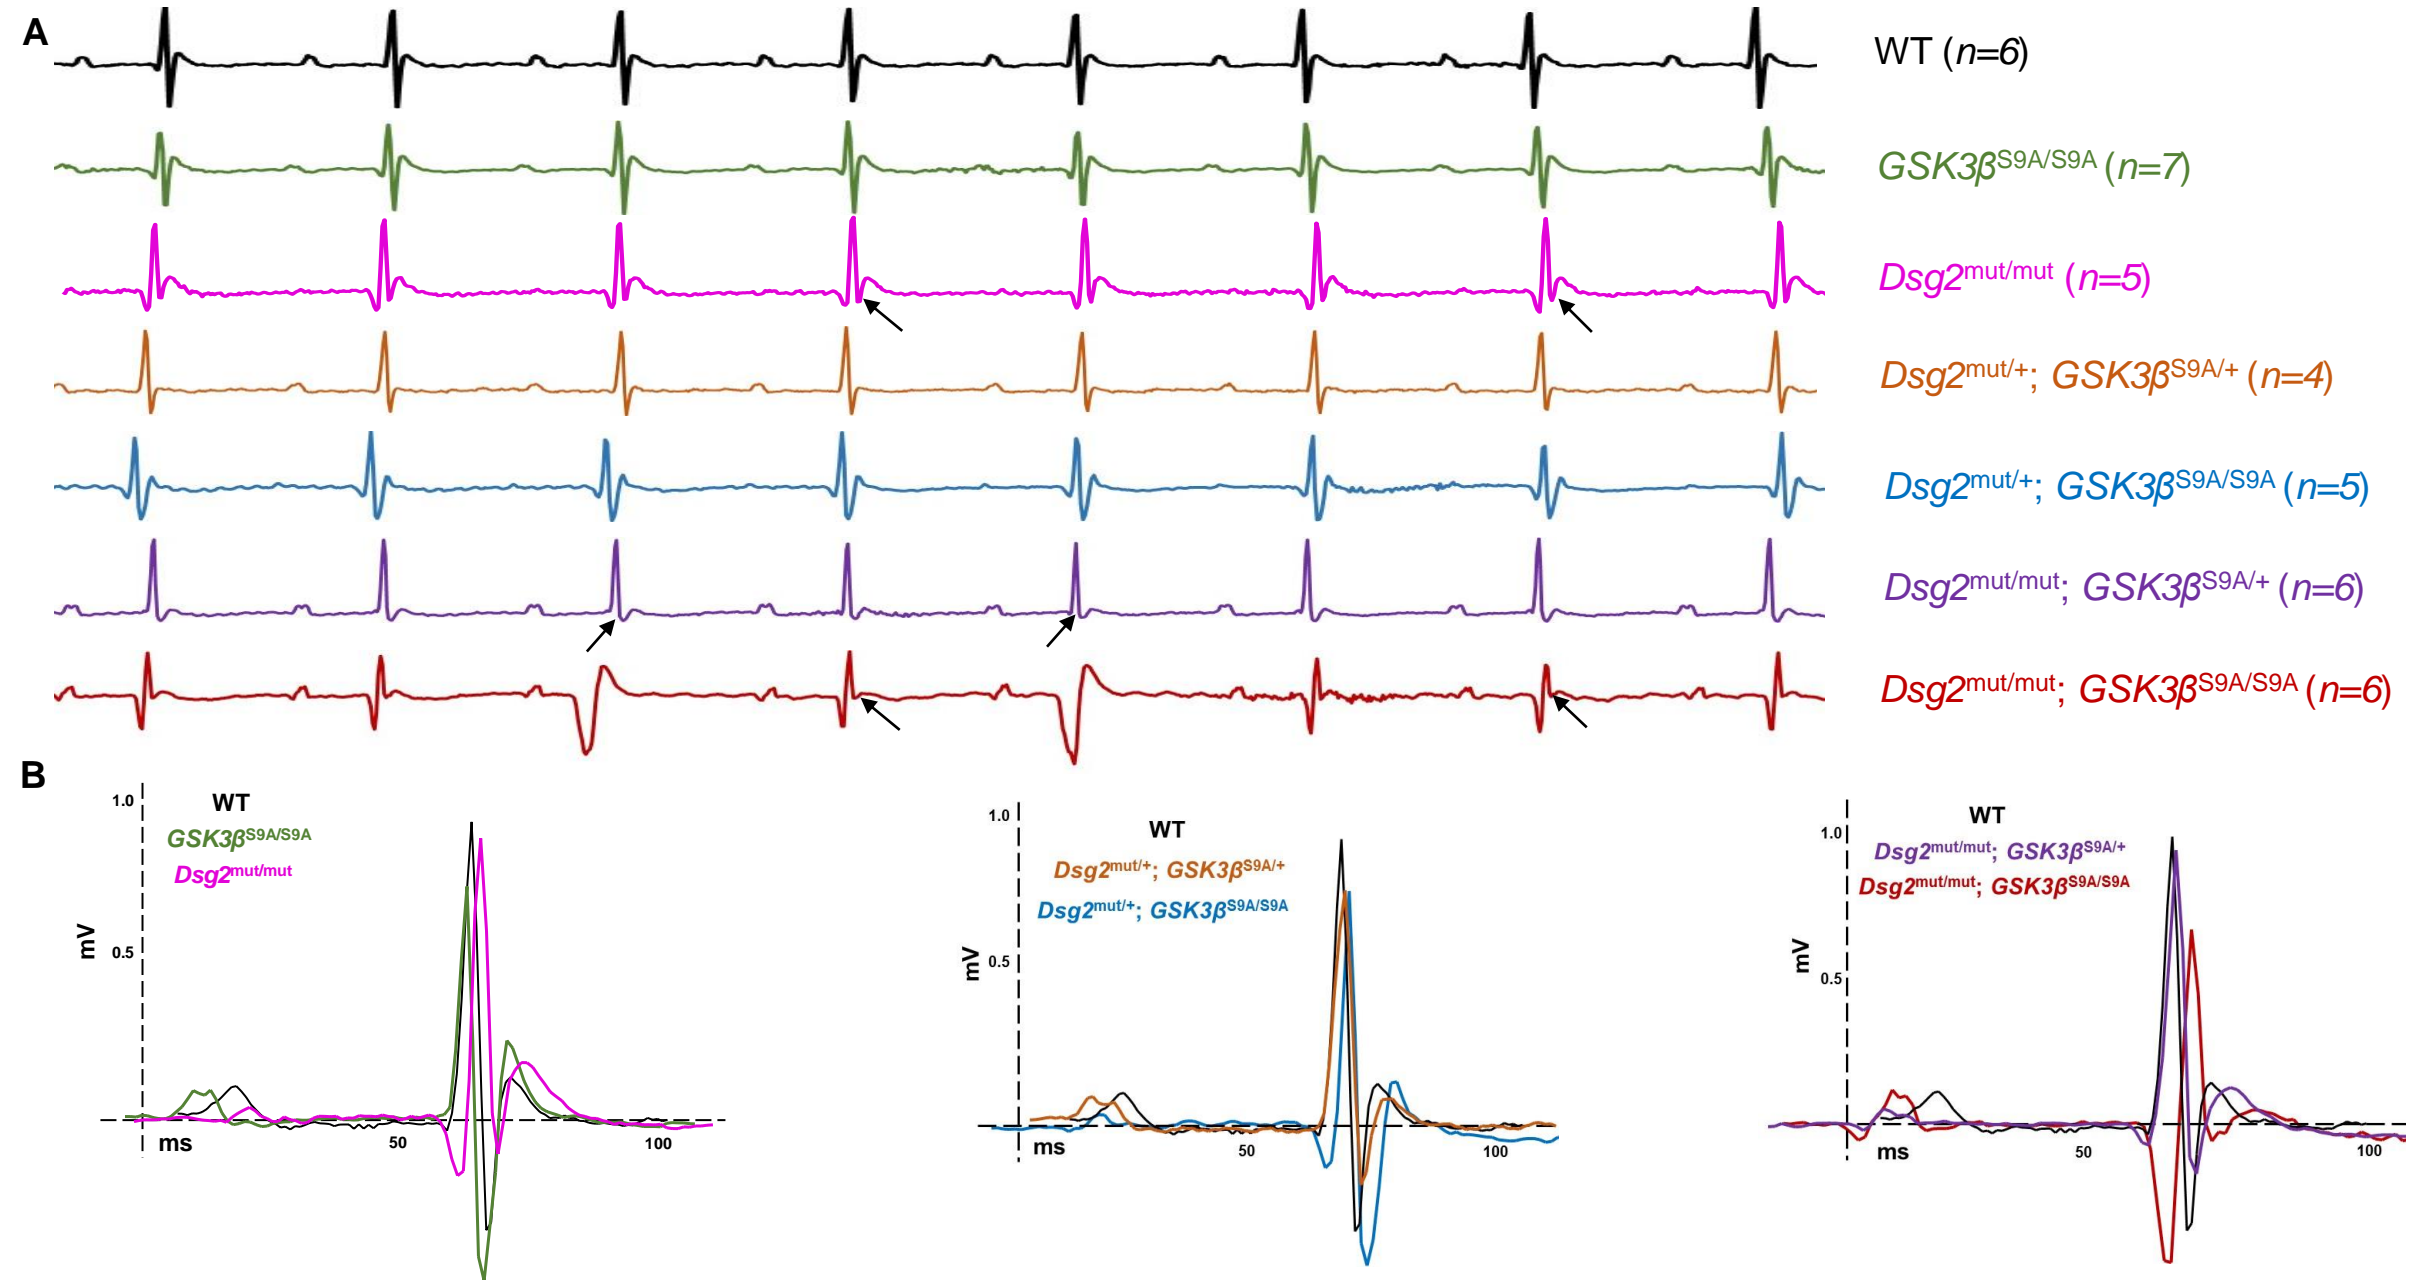

**Supplementary Figure 7. *Dsg2*-mutant mice with one or two copies of constitutively active GSK3 $\beta$ -S9A allele display ECG abnormalities.** (A) Representative ECG tracings from WT,  $GSK3\beta^{S9A/S9A}$ ,  $Dsg2^{mut/mut}$  and  $Dsg2$ -mutant mice with one or two copies of constitutively active GSK3 $\beta$ -S9A allele at 16 weeks of age. Black arrows highlight reduced S-Amplitude. (B) Single ECG tracings from WT and mutant mice. *n*-values are noted above.

|                         | WT          | <i>Dsg2</i> <sup>mut/mut</sup> |
|-------------------------|-------------|--------------------------------|
| <b>Echocardiography</b> |             |                                |
| <i>n</i>                | 8           | 16                             |
| IVSd (mm)               | 0.90 ± 0.03 | 0.76 ± 0.03 ( <i>n</i> =15)    |
| IVSs (mm)               | 1.44 ± 0.1  | 1.07 ± 0.1*                    |
| LVIDd (mm)              | 2.67 ± 0.1  | 3.09 ± 0.1*                    |
| LVIDs (mm)              | 1.07 ± 0.04 | 1.93 ± 0.2*                    |
| LVPWd (mm)              | 0.88 ± 0.04 | 0.9 ± 0.1                      |
| LVPWs (mm)              | 1.48 ± 0.04 | 1.26 ± 0.04* ( <i>n</i> =15)   |
| FS (%)                  | 59.9 ± 1.0  | 38.6 ± 3.8*                    |
| EF (%)                  | 83.9 ± 0.8  | 60.3 ± 4.7*                    |
| <b>Morphometric</b>     |             |                                |
| <i>n</i>                | 8           | 7                              |
| RWT (mm)                | 0.66 ± 0.04 | 0.73 ± 0.1 ( <i>n</i> =16)     |
| LVM (mg)                | 9.34 ± 0.9  | 13.9 ± 1.4*                    |
| LVW/BW (mg/g)           | 0.42 ± 0.3  | 0.67 ± 0.1*                    |
| HW/BW (mg/g)            | 0.57 ± 0.03 | 0.68 ± 0.1                     |

**Supplementary Table 1. Echocardiographic and morphometric indices from WT and *Dsg2*<sup>mut/mut</sup> mice at 8 weeks of age.** IVSd, interventricular septal end-diastolic volume; IVSs, interventricular septal end-systolic volume; LVIDd, left ventricular internal diameter end-diastolic volume; LVIDs, left ventricular internal diameter end-systolic volume; LVPWd, left ventricular posterior wall end diastole; LVPWs, left ventricular posterior wall end systole; FS, fractional shortening; EF, ejection fraction; RWT, relative wall thickness; LVM, left ventricular mass; LVW/BW, left ventricular weight to body weight; HW/BW, heart weight to body weight. mean±SEM, \*P<0.05 *Dsg2*<sup>mut/mut</sup> vs. WT using 2-way ANOVA with Tukey's post-hoc analysis. *n*-values are noted for all variables measured unless otherwise noted in italicized parentheses (*n*=X).



|                         | WT                       |                          | <i>Dsg2</i> <sup>mut/mut</sup> |             | <i>Dsg2</i> <sup>mut/+</sup> |
|-------------------------|--------------------------|--------------------------|--------------------------------|-------------|------------------------------|
|                         | Sedentary                | Swim                     | Sedentary                      | Swim        | Swim                         |
| <b>Echocardiography</b> |                          |                          |                                |             |                              |
| <i>n</i>                | 8                        | 8                        | 7                              | 5           | 9                            |
| IVSd (mm)               | 0.91 ± 0.03              | 0.97 ± 0.02 <sup>†</sup> | 0.78 ± 0.04 <sup>*</sup>       | 0.72 ± 0.1  | 1.03 ± 0.02 <sup>†</sup>     |
| IVSs (mm)               | 1.51 ± 0.04              | 1.6 ± 0.04 <sup>†</sup>  | 1.05 ± 0.11 <sup>*</sup>       | 0.97 ± 0.17 | 1.54 ± 0.04 <sup>†</sup>     |
| LVIDd (mm)              | 2.73 ± 0.09              | 2.8 ± 0.05 <sup>†</sup>  | 3.42 ± 0.31 <sup>*</sup>       | 3.9 ± 0.41  | 2.8 ± 0.05 <sup>†</sup>      |
| LVIDs (mm)              | 1.08 ± 0.06              | 1.09 ± 0.03 <sup>†</sup> | 2.54 ± 0.41 <sup>*</sup>       | 2.76 ± 0.6  | 1.05 ± 0.03 <sup>†</sup>     |
| LVPWd (mm)              | 0.88 ± 0.05              | 0.93 ± 0.01              | 0.87 ± 0.05                    | 0.85 ± 0.06 | 0.98 ± 0.04 <sup>†</sup>     |
| LVPWs (mm)              | 1.54 ± 0.04 <sup>‡</sup> | 1.64 ± 0.03 <sup>†</sup> | 1.22 ± 0.05 <sup>*</sup>       | 1.24 ± 0.13 | 1.63 ± 0.04 <sup>†</sup>     |
| FS (%)                  | 60.6 ± 1.25              | 61.7 ± 0.6 <sup>†</sup>  | 27.8 ± 4.5 <sup>*</sup>        | 31.7 ± 8.6  | 62.6 ± 0.56 <sup>†</sup>     |
| EF (%)                  | 84.4 ± 1.0               | 85.3 ± 0.46 <sup>†</sup> | 46.8 ± 7.0 <sup>*</sup>        | 51.0 ± 11.0 | 86.0 ± 0.43 <sup>†</sup>     |
| <b>Morphometric</b>     |                          |                          |                                |             |                              |
| <i>n</i>                | 8                        | 8                        | 7                              | 5           | 9                            |
| RWT (mm)                | 0.65 ± 0.05              | 0.66 ± 0.02              | 0.53 ± 0.05                    | 0.68 ± 0.13 | 1.17 ± 0.04 <sup>†</sup>     |
| LVM (mg)                | 9.8 ± 1.2                | 11.0 ± 0.09              | 13.6 ± 1.9                     | 14.4 ± 2.6  | 12.6 ± 1.5                   |
| LVW/BW (mg/g)           | 0.44 ± 0.04 <sup>‡</sup> | 0.53 ± 0.03              | 0.65 ± 0.09 <sup>*</sup>       | 0.68 ± 0.11 | 0.61 ± 0.07                  |
| HW/BW (mg/g)            | 0.58 ± 0.02              | 0.6 ± 0.02               | 0.68 ± 0.06                    | 0.61 ± 0.04 | 0.63 ± 0.05                  |

**Supplementary Table 2. Echocardiographic and morphometric indices from Vehicle-treated sedentary and exercised (Swim) mice at 16 weeks of age.** IVSd, interventricular septal end-diastolic volume; IVSs, interventricular septal end-systolic volume; LVIDd, left ventricular internal diameter end-diastolic volume; LVIDs, left ventricular internal diameter end-systolic volume; LVPWd, left ventricular posterior wall end diastole; LVPWs, left ventricular posterior wall end systole; FS, fractional shortening; EF, ejection fraction; RWT, relative wall thickness; LVM, left ventricular mass; LVW/BW, left ventricular weight to body weight; HW/BW, heart weight to body weight. mean±SEM, P<0.05 for <sup>\*</sup>*Dsg2*<sup>mut/mut</sup> (Sedentary) vs. WT (Sedentary); <sup>†</sup>WT and <sup>†</sup>*Dsg2*<sup>mut/+</sup> (Swim) vs. *Dsg2*<sup>mut/mut</sup> (Swim); and <sup>‡</sup>WT (Sedentary) vs. WT (Swim) using 2-way ANOVA with Tukey's post-hoc analysis. *n-values* noted above.

|                            | WT            | <i>GSK3β</i> <sup>S9A/S9A</sup> | <i>Dsg2</i> <sup>mut/mut</sup> | <i>Dsg2</i> <sup>mut/+</sup>  |                                 | <i>Dsg2</i> <sup>mut/mut</sup> |                                 |
|----------------------------|---------------|---------------------------------|--------------------------------|-------------------------------|---------------------------------|--------------------------------|---------------------------------|
|                            |               |                                 |                                | <i>GSK3β</i> <sup>S9A/+</sup> | <i>GSK3β</i> <sup>S9A/S9A</sup> | <i>GSK3β</i> <sup>S9A/+</sup>  | <i>GSK3β</i> <sup>S9A/S9A</sup> |
| <b>Electrocardiography</b> |               |                                 |                                |                               |                                 |                                |                                 |
| <i>n</i>                   | 6             | 7                               | 5                              | 4                             | 5                               | 6                              | 6                               |
| PR-I (ms)                  | 33.0 ± 0.8‡   | 40.5 ± 2.0*†                    | 32.8 ± 2.7‡                    | 42.6 ± 1.5*†                  | 39.6 ± 1.8*†                    | 40.6 ± 2.0*†                   | 40.2 ± 1.4*†                    |
| Pd (ms)                    | 9.7 ± 0.8     | 8.8 ± 0.8                       | 9.01 ± 2.1                     | 11.9 ± 0.9‡                   | 9.4 ± 1.5                       | 10.9 ± 0.7‡                    | 10.7 ± 1.1                      |
| P-Amp (mV)                 | 0.06 ± 0.01†† | 0.04 ± 0.01*                    | 0.03 ± 0.01*                   | 0.09 ± 0.01††                 | 0.05 ± 0.01                     | 0.05 ± 0.01                    | 0.05 ± 0.004                    |
| QRSd (ms)                  | 11.4 ± 0.5†   | 12.4 ± 0.9                      | 14.3 ± 1.3*                    | 14.2 ± 1.6*                   | 13.8 ± 0.69*                    | 14.2 ± 0.66*                   | 14.5 ± 0.9*                     |
| Q-Amp (mV)                 | -0.02 ± 0.01† | -0.02 ± 0.01†                   | -0.11 ± 0.03*‡                 | -0.02 ± 0.01†                 | -0.04 ± 0.01†                   | -0.04 ± 0.02†                  | -0.13 ± 0.05*‡                  |
| S-Amp (mV)                 | -0.36 ± 0.08† | -0.22 ± 0.07†                   | -0.03 ± 0.02*‡                 | -0.19 ± 0.07†                 | -0.24 ± 0.05†                   | -0.09 ± 0.06*                  | -0.06 ± 0.03*‡                  |

**Supplementary Table 3. Electrocardiographic indices from 16 week old WT, *GSK3β*<sup>S9A/S9A</sup>, *Dsg2*<sup>mut/mut</sup> and *Dsg2*-mutant mice with one or two copies of constitutively active *GSK3β*-S9A.** PR-I, PR-Interval; Pd, P duration; P-Amp, P-Amplitude; QRSd, QRS duration; Q-Amp, Q-Amplitude; S-Amp, S-Amplitude. Data presented as mean±SEM, *n-values* noted above, with a P<0.05 deemed significant using 2-way ANOVA with Tukey's post hoc analysis. \*All groups vs. WT; †All groups vs. *Dsg2*<sup>mut/mut</sup>; ‡All groups vs. *GSK3β*<sup>S9A/S9A</sup>.

# Unedited Gels

Lanes of the unedited gels which correspond to those shown within the manuscript have a dashed white box surrounding them.

# Full unedited gels for **Figure 2A**

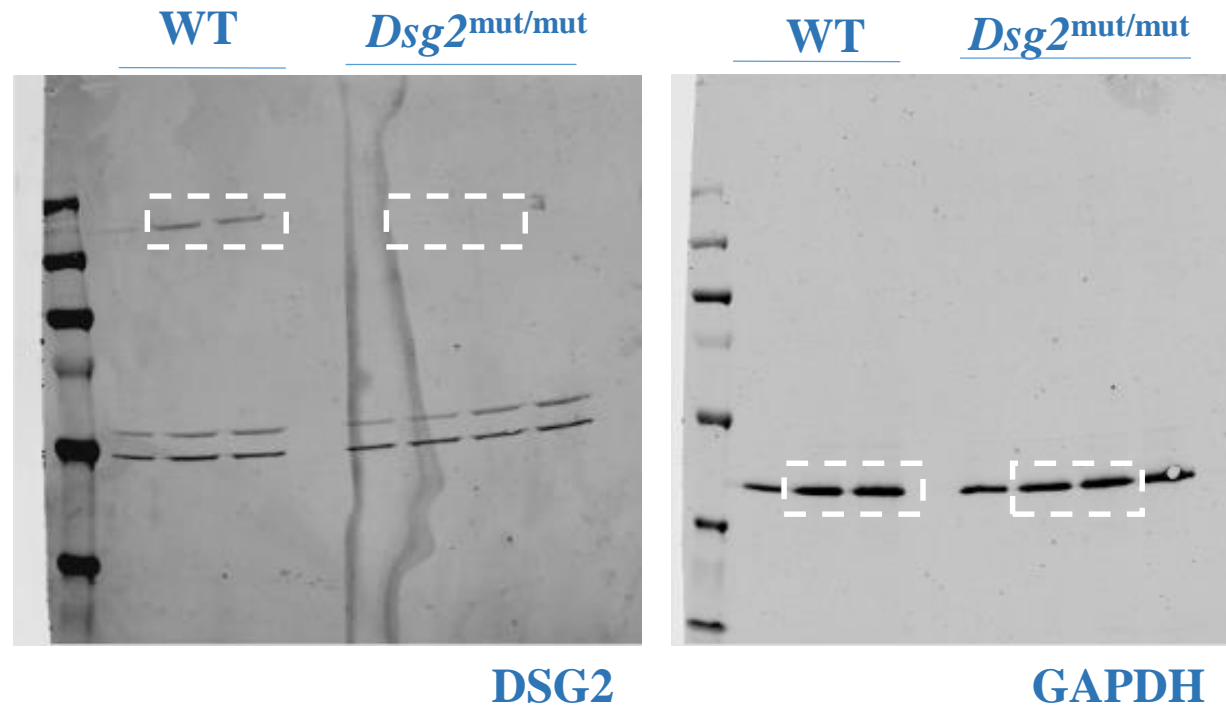

**16 Weeks of Age (NO Vehicle, NO SB216763)**

# Full unedited gels for **Figure 3A**

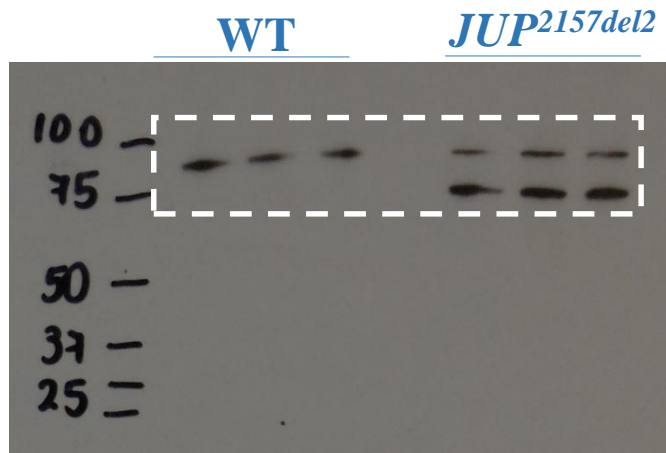

**Plakoglobin (N-term)**

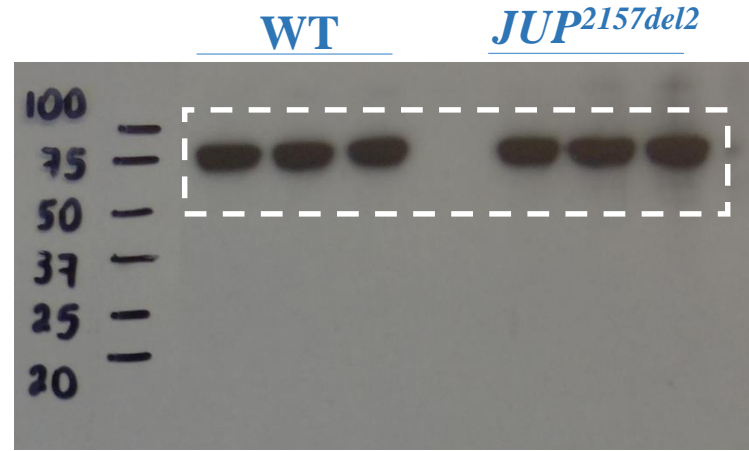

**Plakoglobin (C-term)**

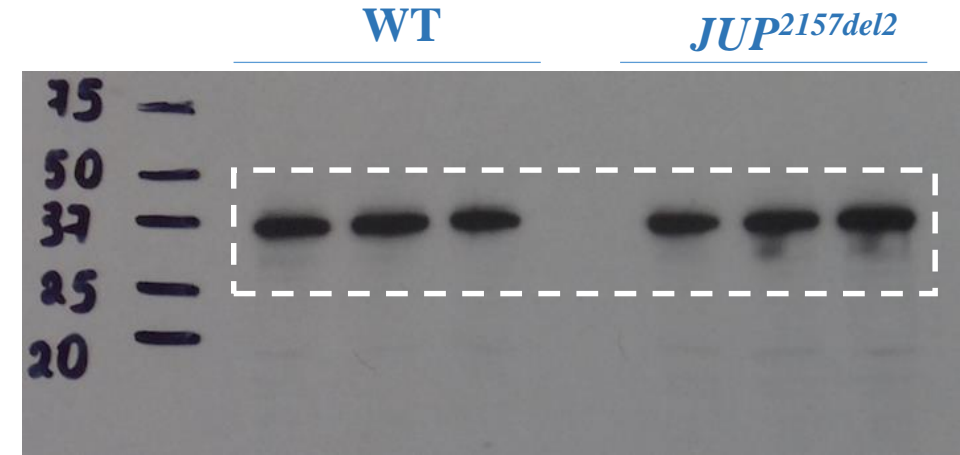

**GAPDH**

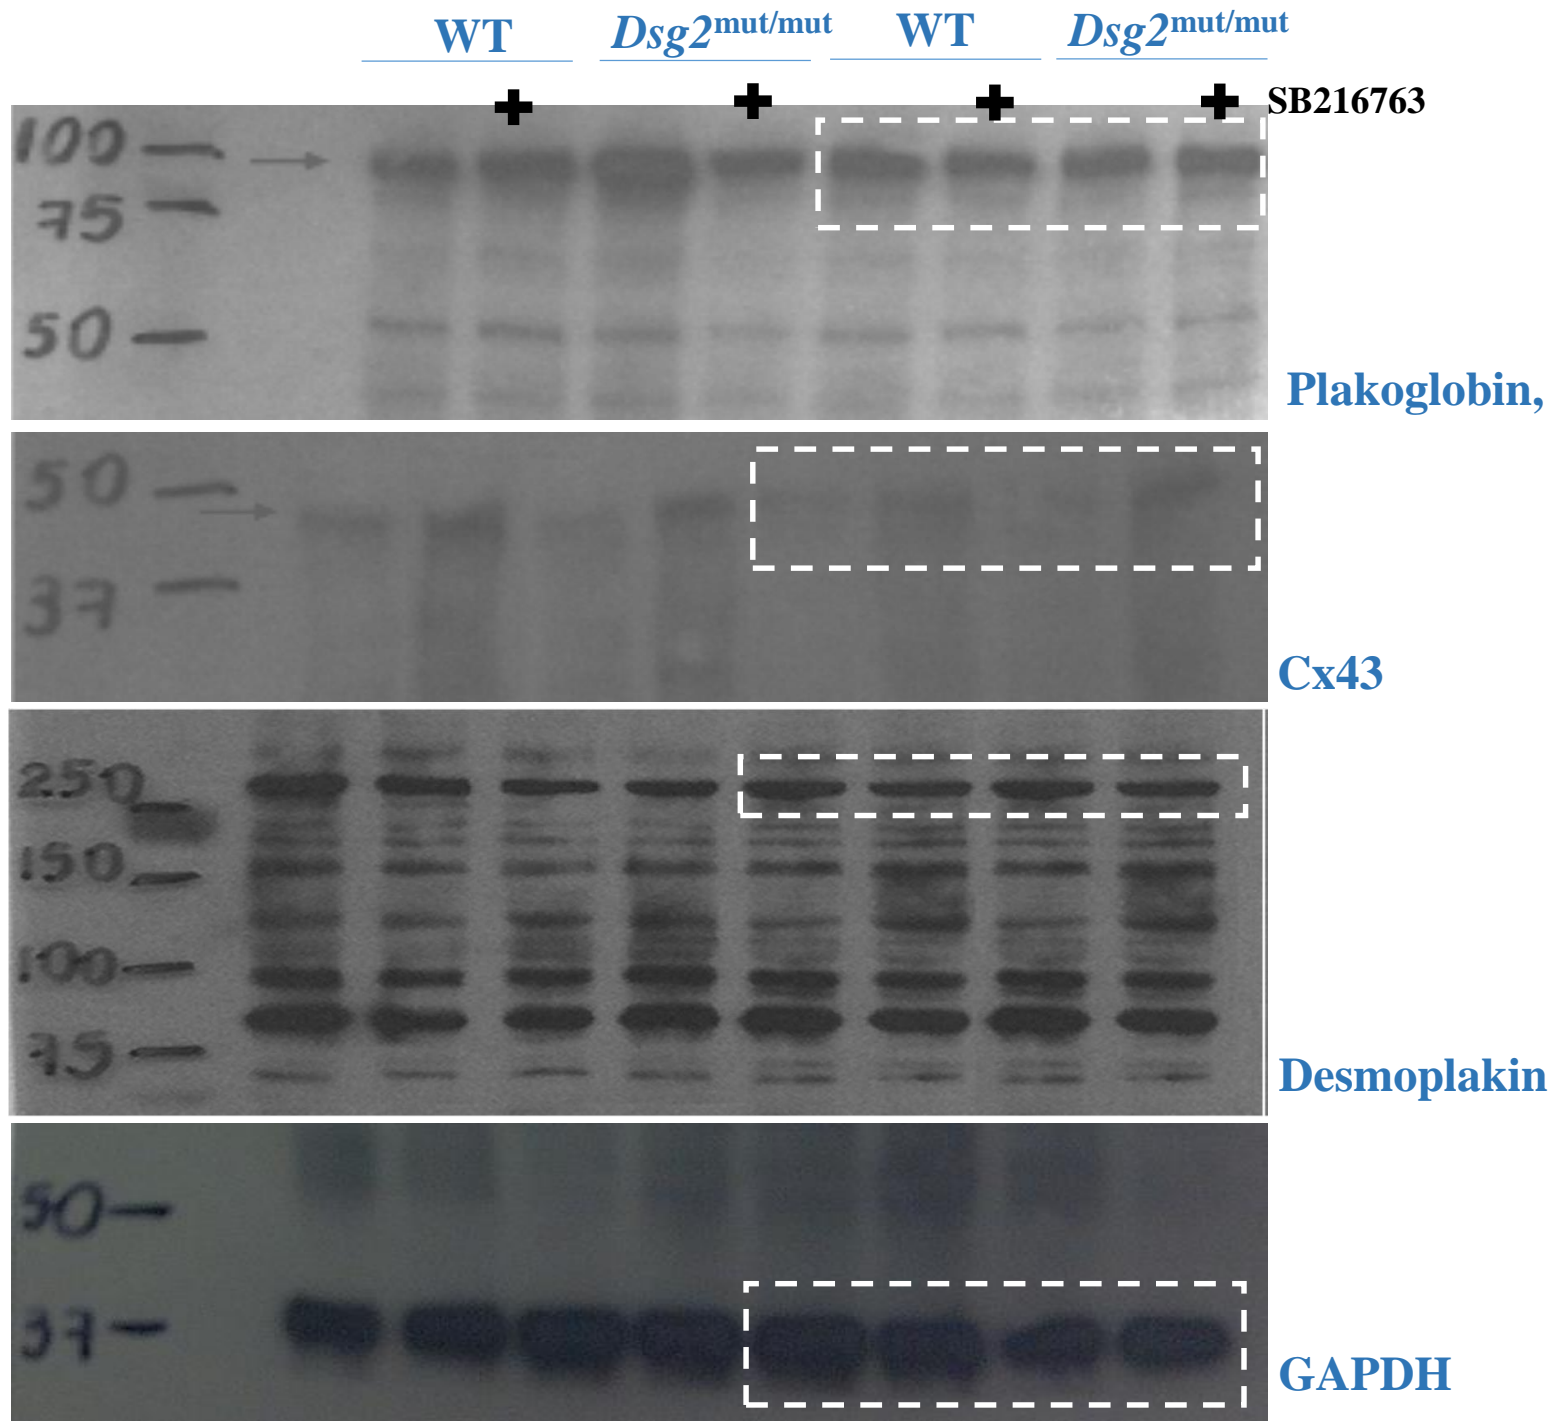

Full unedited gels for **Figure 5C** (*Dsg2* Mutant Mouse, Upper Panel)

# Full unedited gels for **Figure 5D** (*JUP* Mutant Mouse, Lower Panel)

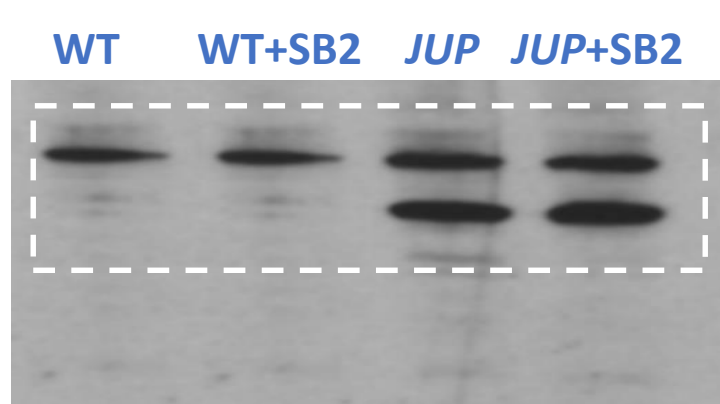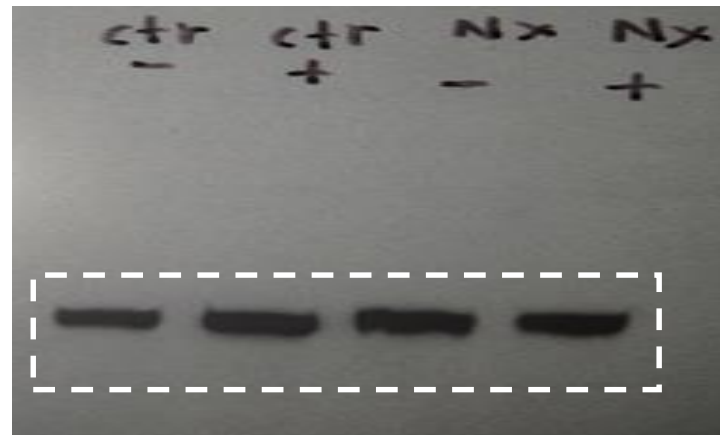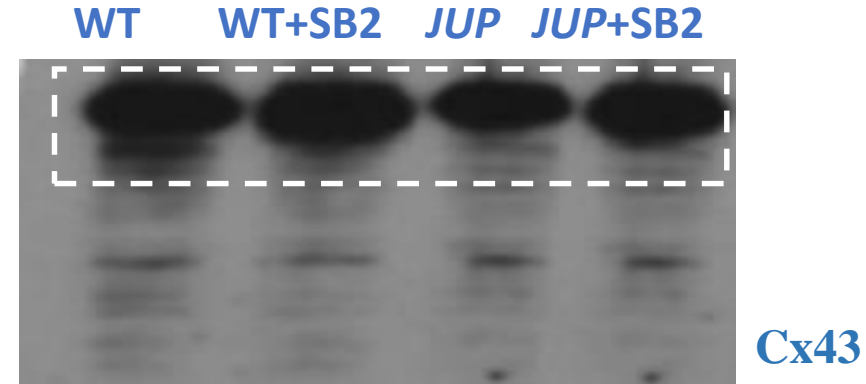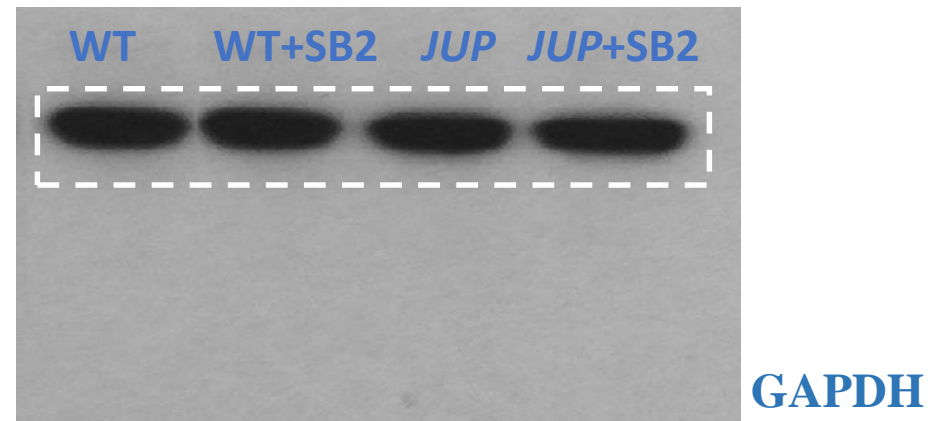

WT *JUP*<sup>2157del2</sup> WT *Dsg2*<sup>mut/mut</sup>

+

+

+

+

SB216763

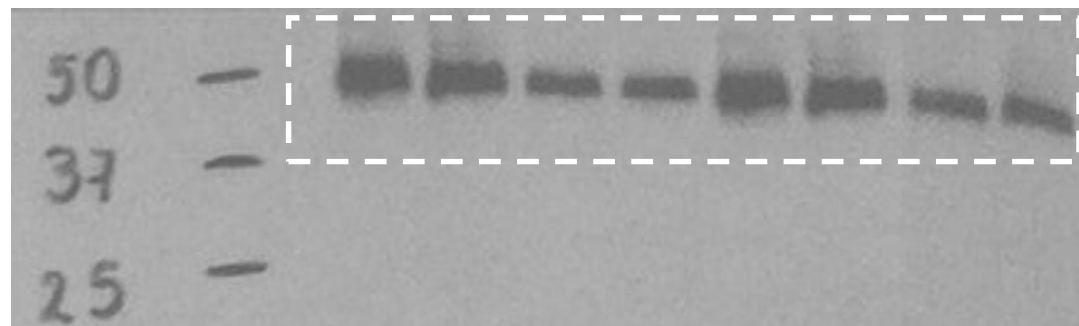

GSK3 $\alpha$

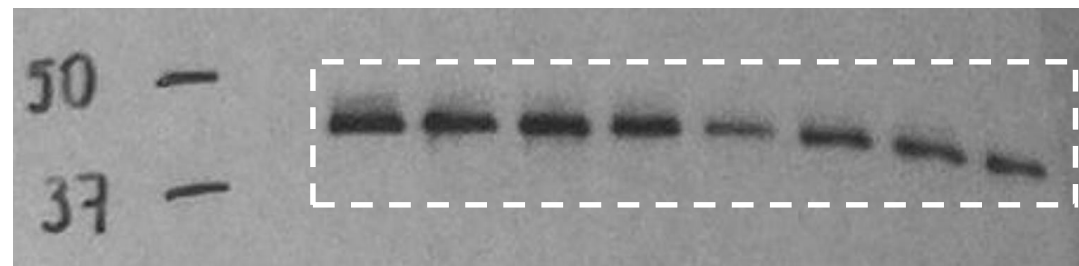

pGSK3 $\beta$  (Ser9)

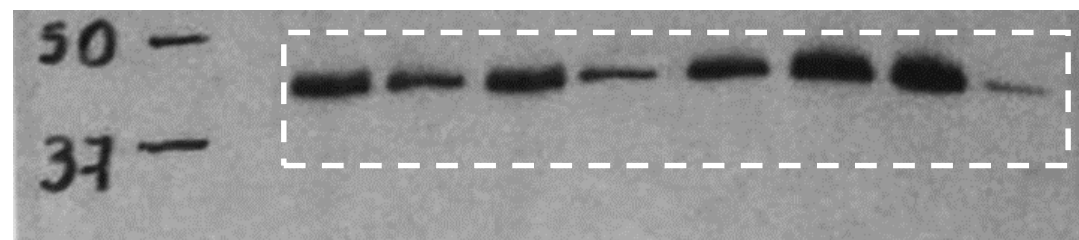

GSK3 $\beta$

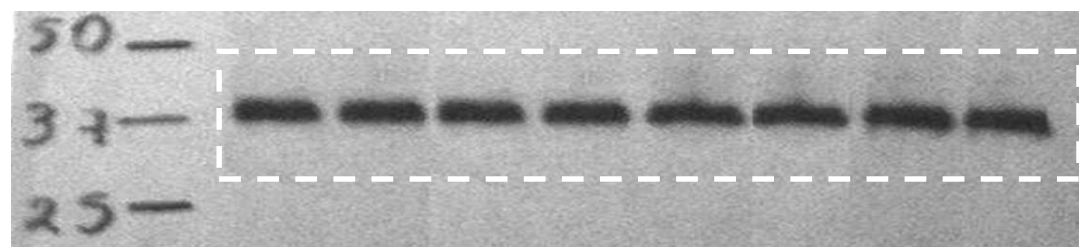

GAPDH

Full unedited gels for **Figure 6B**



# Full unedited gel for **Figure 8A**

1. un-transfected controls
2. **GSK3 $\beta$ -shRNA**
3. ***JUP*<sup>2157del2</sup>**
4. ***PKP2*<sup>1851del123</sup>**
5. ***JUP*<sup>2157del2</sup> & GSK3 $\beta$ -shRNA**
6. ***PKP2*<sup>1851del123</sup> & GSK3 $\beta$ -shRNA**

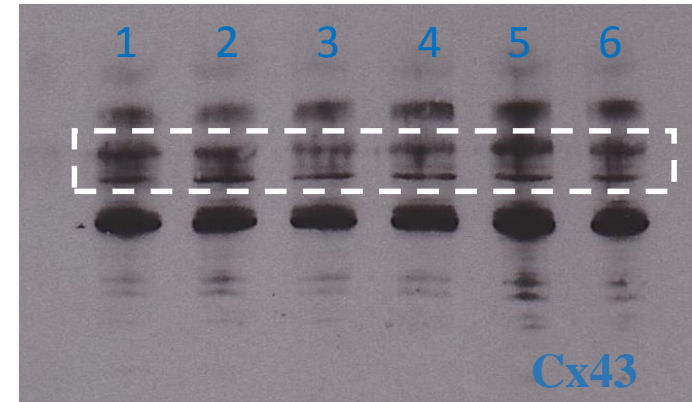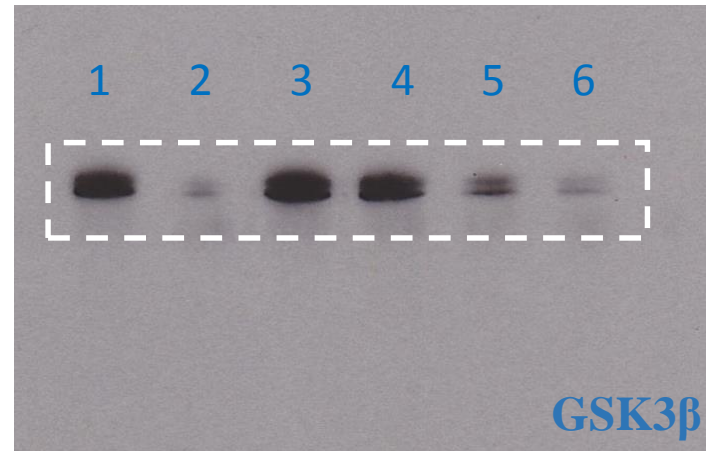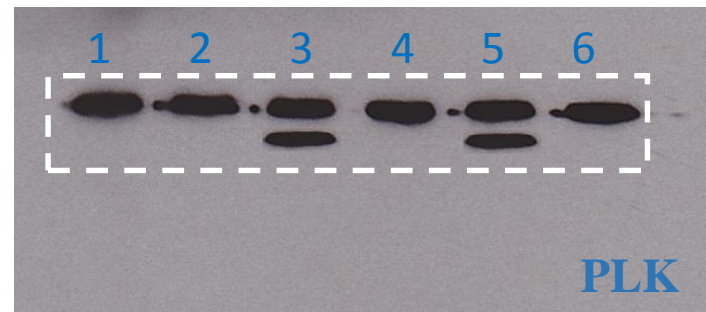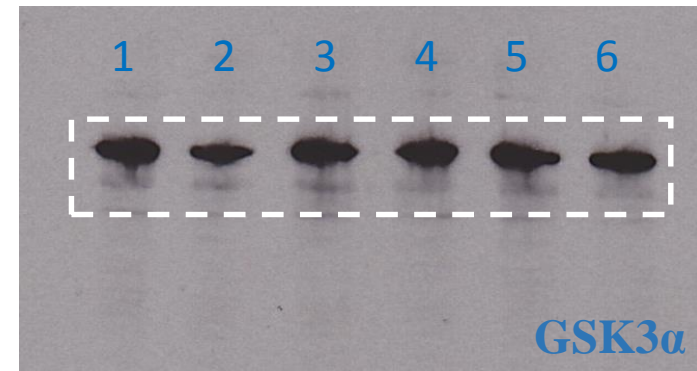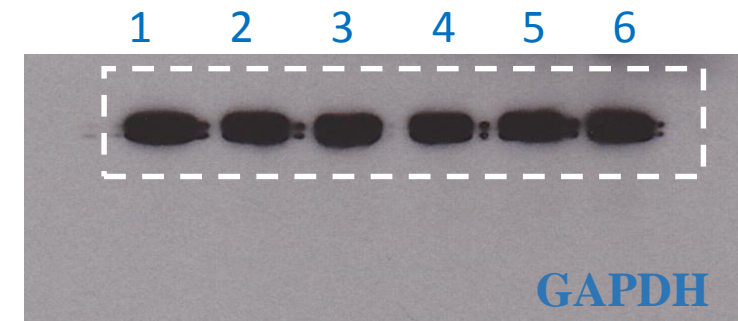

# Full unedited gels for Supplementary Figure 3B

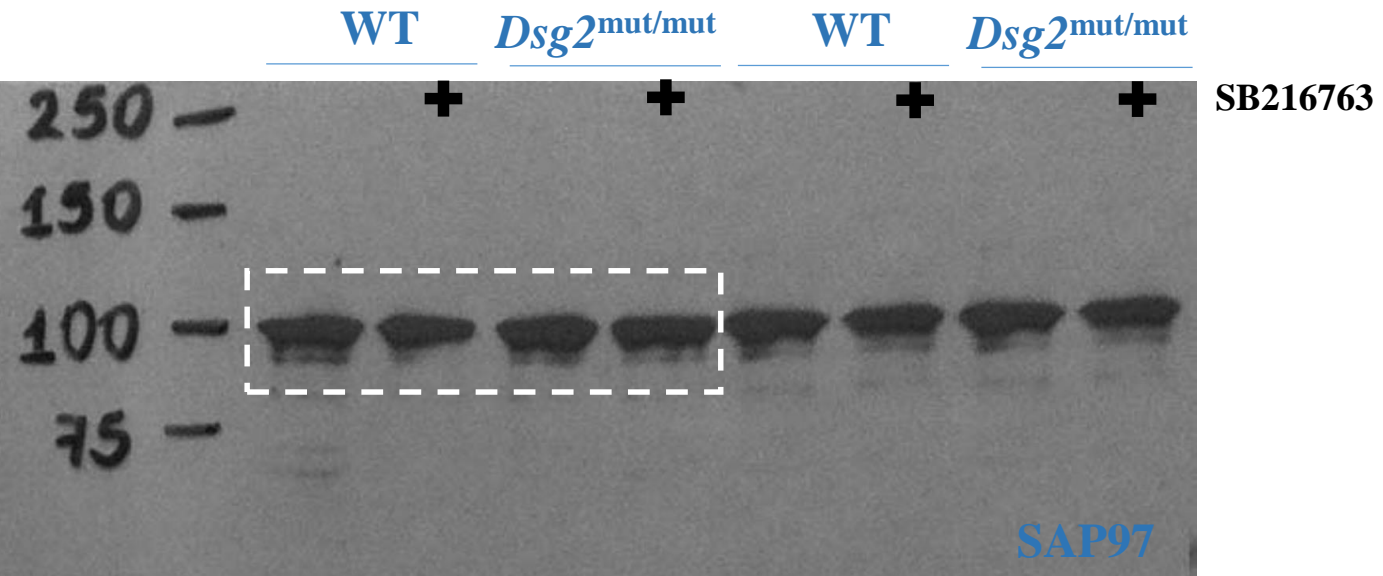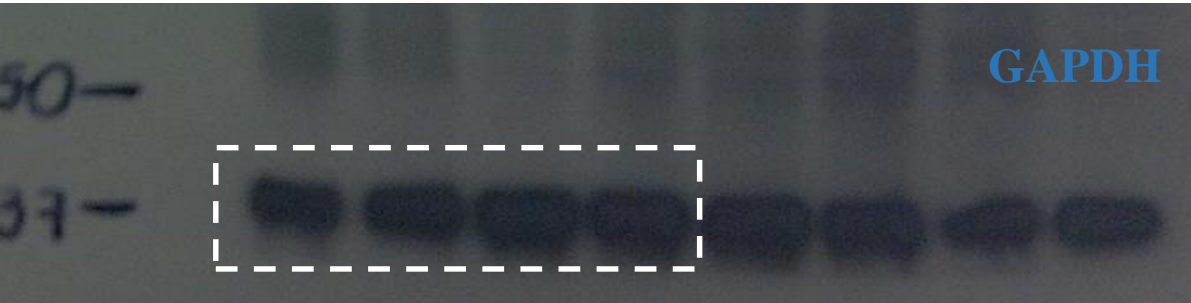

This is the same GAPDH film presented in Figure 5C, however this is the exact same blot that SAP97 was run on.

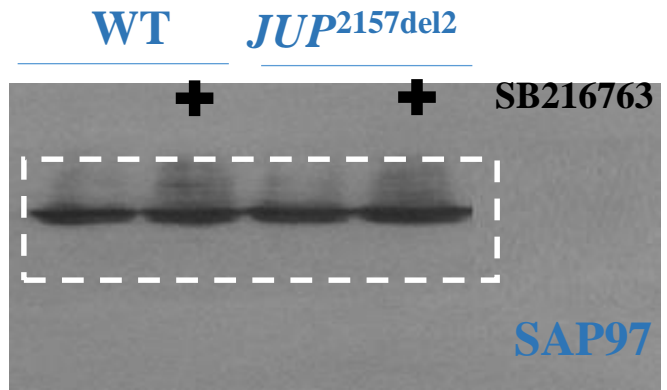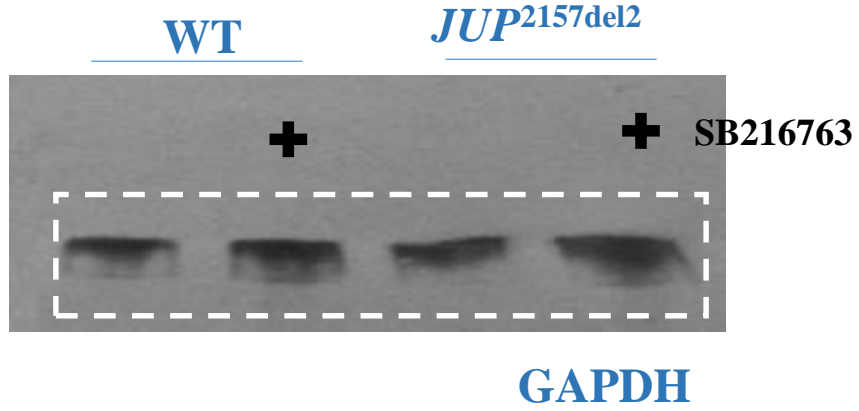

Supplement: NIHMS781138-supplement-Supplemental_Data.pdf [file NIHMS781138-supplement-Supplemental_Data.pdf]
